# Supplementary material
Source: PubMed Central journal article supplement (PMC8525515)
Supplement: mmc1.pdf [file mmc1.pdf]

**Supplemental information**

**Generation and transmission of interlineage recombinants in the SARS-CoV-2 pandemic**

**Ben Jackson, Maciej F. Boni, Matthew J. Bull, Amy Colleran, Rachel M. Colquhoun, Alistair C. Darby, Sam Haldenby, Verity Hill, Anita Lucaci, John T. McCrone, Samuel M. Nicholls, Áine O'Toole, Nicole Pacchiarini, Radoslaw Poplawski, Emily Scher, Flora Todd, Hermione J. Webster, Mark Whitehead, Claudia Wierzbicki, The COVID-19 Genomics UK (COG-UK) Consortium, Nicholas J. Loman, Thomas R. Connor, David L. Robertson, Oliver G. Pybus, and Andrew Rambaut**

**Table S1. The first iteration of mosaic genome structure detection for the putative recombinants. (See STAR Methods; see also Tables 1 and 2).**

Nucleotide, amino acid, or deletion states at the 22 sites where mutations define lineage B.1.1.7 from its immediate ancestor, for each putative recombinant. The genotype column names are in one of the following formats: (i) “snp”, followed by the nucleotide in MN908947.3 (reference), the position in the MN908947.3 genome, then the nucleotide in B.1.1.7; (ii) “aa” (amino acid), followed by the name of the coding sequence, the residue in MN908947.3, the position of the residue in the coding sequence, then the residue in B.1.1.7; (iii) “del” (deletion) followed by the first position of the deletion, then the length of the deletion. For the contents of the amino acid columns, an asterisk (\*) denotes a stop codon. For the contents of the deletion genotype columns, del=deletion present; ref=deletion absent. Lineage B.1.1.7 states are coloured red, and MN908947.3 alleles are coloured white. The mosaic structures visible here informed the first iteration of recombination detection.

| Sample Name  | Group | Sample Date | snp:C913T | aa:ORF1ab:T1001I | aa:ORF1ab:A1708D | snp:C5986T | aa:ORF1ab:I2230T | del:I1288-9 | snp:C14676T | snp:C15279T | snp:T16176C | del:21765-6 | del:21991-3 | aa:s:N501Y | aa:s:A570D | aa:s:P681H | aa:s:T716I | aa:s:S982A | aa:s:D1118H | aa:ORF8:Q27* | aa:ORF8:R52I | aa:ORF8:Y73C | aa:N:D3L | aa:N:S235F |
|--------------|-------|-------------|-----------|------------------|------------------|------------|------------------|-------------|-------------|-------------|-------------|-------------|-------------|------------|------------|------------|------------|------------|-------------|--------------|--------------|--------------|----------|------------|
| CAMC-CBA018  | -     | 18/12/2020  | C         | T                | A                | C          | I                | ref         | C           | C           | T           | del         | del         | Y          | D          | H          | I          | A          | H           | *            | I            | C            | L        | F          |
| ALDP-11CF93B | A     | 30/01/2021  | C         | T                | A                | C          | I                | ref         | C           | C           | T           | del         | del         | Y          | D          | H          | I          | A          | H           | *            | I            | C            | L        | F          |
| ALDP-125C4D7 | A     | 06/02/2021  | C         | T                | A                | C          | I                | ref         | C           | C           | T           | del         | del         | Y          | D          | H          | I          | A          | H           | *            | I            | C            | L        | F          |
| LIVE-DFCFE   | A     | 14/02/2021  | C         | T                | A                | C          | I                | ref         | C           | C           | T           | del         | del         | Y          | D          | H          | I          | A          | H           | *            | I            | C            | L        | F          |
| ALDP-130BB95 | A     | 21/02/2021  | C         | T                | A                | C          | I                | ref         | C           | C           | T           | del         | del         | Y          | D          | H          | I          | A          | H           | *            | I            | C            | L        | F          |
| QEUH-CCCB30  | B     | 23/12/2020  | C         | T                | A                | C          | T                | del         | T           | T           | C           | del         | del         | Y          | D          | H          | I          | A          | H           | *            | I            | C            | L        | F          |
| QEUH-CD0F1F  | B     | 24/12/2020  | C         | T                | A                | C          | T                | del         | T           | T           | C           | del         | del         | Y          | D          | H          | I          | A          | H           | *            | I            | C            | L        | F          |
| MILK-1166F52 | C     | 24/01/2021  | T         | I                | D                | T          | T                | del         | T           | T           | C           | del         | del         | Y          | D          | H          | I          | A          | H           | Q            | R            | Y            | D        | S          |
| MILK-11C95A6 | C     | 30/01/2021  | T         | I                | D                | T          | T                | del         | T           | T           | C           | del         | del         | Y          | D          | H          | I          | A          | H           | Q            | R            | Y            | D        | S          |
| QEUH-109B25C | C     | 18/01/2021  | T         | I                | D                | T          | T                | del         | T           | T           | C           | del         | del         | Y          | D          | H          | I          | A          | H           | Q            | R            | Y            | D        | S          |
| MILK-126FE1F | D     | 07/02/2021  | C         | T                | A                | C          | I                | ref         | C           | C           | T           | ref         | ref         | Y          | D          | H          | I          | A          | H           | *            | I            | C            | L        | F          |
| RAND-12671E1 | D     | 02/02/2021  | C         | T                | A                | C          | I                | ref         | C           | C           | T           | ref         | ref         | Y          | D          | H          | I          | A          | H           | *            | I            | C            | L        | F          |
| RAND-128FA33 | D     | 02/02/2021  | C         | T                | A                | C          | I                | ref         | C           | C           | T           | ref         | ref         | Y          | D          | H          | I          | A          | H           | *            | I            | C            | L        | F          |
| CAMC-CB7AB3  | -     | 18/12/2020  | T         | I                | A                | C          | I                | ref         | C           | C           | T           | del         | del         | Y          | D          | H          | I          | A          | H           | *            | I            | C            | L        | F          |
| MILK-103C712 | -     | 12/01/2021  | C         | T                | A                | C          | I                | ref         | C           | C           | T           | ref         | ref         | N          | A          | P          | T          | S          | D           | *            | I            | C            | L        | F          |
| QEUH-1067DEF | -     | 17/01/2021  | T         | I                | D                | T          | T                | ref         | C           | C           | T           | ref         | ref         | N          | A          | P          | T          | S          | D           | Q            | R            | Y            | D        | S          |

**Table S2. GISAID and ENA accession numbers for the 16 putative recombinant sequences. (See STAR Methods).**

| Sample       | Group | GISAID accession | ENA sample accession | ENA sample secondary accession | ENA run accession |
|--------------|-------|------------------|----------------------|--------------------------------|-------------------|
| ALDP-11CF93B | A     | EPI_ISL_989697   | ERS5764793           | SAMEA8077663                   | ERR5308556        |
| ALDP-125C4D7 | A     | EPI_ISL_1019487  | ERS5792357           | SAMEA8105282                   | ERR5323237        |
| ALDP-130BB95 | A     | EPI_ISL_1122630  | ERS5883487           | SAMEA8196877                   | ERR5414941        |
| LIVE-DFCFE   | A     | EPI_ISL_1104468  | ERS5872630           |                                | ERR5404883        |
| QEUH-CCCB30  | B     | EPI_ISL_782203   | ERS5522602           | SAMEA7775362                   | ERR5058070        |
| QEUH-CD0F1F  | B     | EPI_ISL_782442   | ERS5522673           | SAMEA7775433                   | ERR5058141        |
| MILK-1166F52 | C     | EPI_ISL_938901   | ERS5697106           | SAMEA8009867                   | ERR5272107        |
| MILK-11C95A6 | C     | EPI_ISL_1050799  | ERS5874115           |                                | ERR5406307        |
| QEUH-109B25C | C     | EPI_ISL_909004   | ERS5669824           | SAMEA7982538                   | ERR5232711        |
| MILK-126FE1F | D     | EPI_ISL_1057512  | ERS5812369           | SAMEA8125397                   | ERR5349458        |
| RAND-12671E1 | D     | EPI_ISL_1045772  | ERS5805519           | SAMEA8118538                   | ERR5335088        |
| RAND-128FA33 | D     | EPI_ISL_1042110  | ERS5809401           | SAMEA8122425                   | ERR5340986        |
| CAMC-CBA018  | -     | EPI_ISL_777766   | ERS5517714           | SAMEA7770468                   | ERR5054123        |
| CAMC-CB7AB3  | -     | EPI_ISL_777974   | ERS5517673           | SAMEA7770427                   | ERR5054082        |
| MILK-103C712 | -     | EPI_ISL_994038   | ERS5760589           | SAMEA8073454                   | ERR5304348        |
| QEUH-1067DEF | -     | EPI_ISL_917983   | ERS5674718           | SAMEA7987439                   | ERR5238288        |

**Table S3. Phylogenetic placement and UF bootstrap support for the two parental tracts of each recombinant’s genome, among the whole UK epidemic. (See STAR Methods).**

For CAMC-CB7AB3, “Left” refers to the inner part of its genome, and “Right” refers to the outer part of its genome. The full phylogenies with bootstrap support are available at <https://github.com/COG-UK/UK-recombination-analysis>

| Sample       | Group | Left placement      | Left support | Right placement | Right support |
|--------------|-------|---------------------|--------------|-----------------|---------------|
| ALDP-11CF93B | A     | B.1.177             | 81           | B.1.1.7         | 100           |
| ALDP-125C4D7 | A     | B.1.177             | 81           | B.1.1.7         | 100           |
| LIVE-DFCFE   | A     | B.1.177             | 81           | B.1.1.7         | 100           |
| ALDP-130BB95 | A     | B.1.177             | 81           | B.1.1.7         | 100           |
| QEUH-CCCB30  | B     | B.1.36.28           | 97           | B.1.1.7         | 100           |
| QEUH-CD0F1F  | B     | B.1.36.28           | 97           | B.1.1.7         | 100           |
| MILK-1166F52 | C     | B.1.1.7             | 100          | B.1.221.1       | 98            |
| MILK-11C95A6 | C     | B.1.1.7             | 100          | B.1.221.1       | 98            |
| QEUH-109B25C | C     | B.1.1.7             | 100          | B.1.221.1       | 98            |
| MILK-126FE1F | D     | B.1.36.17/B.1.36.39 | 100          | B.1.1.7         | 100           |
| RAND-12671E1 | D     | B.1.36.17/B.1.36.39 | 100          | B.1.1.7         | 100           |
| RAND-128FA33 | D     | B.1.36.17/B.1.36.39 | 100          | B.1.1.7         | 100           |
| CAMC-CB7AB3  | -     | B.1.177             | 39           | B.1.1.7         | 100           |
| CAMC-CBA018  | -     | B.1.177             | 94           | B.1.1.7         | 100           |
| MILK-103C712 | -     | B.1.177             | 100          | B.1.1.7         | 100           |
| QEUH-1067DEF | -     | B.1.1.7             | 100          | B.1.177         | 100           |
